# Supplementary material for: Phytosiderophore Efflux Transporters Are Crucial for Iron Acquisition in Graminaceous Plants
Source: PubMed Central journal article supplement — J Biol Chem. 2010 Dec 14;286(7):5446–54. doi: 10.1074/jbc.M110.180026 (PMC3037657; doi:10.1074/jbc.m110.180026), 2010-12-14
Supplement: supp_M110.180026_jbc.M110.180026-1.pdf [file supp_M110.180026_jbc.M110.180026-1.pdf]

Table S1. Oligo microarray analysis of the roots and the shoots of OXOs, OXHv, RNAi and VC rice under Fe-deficient conditions.

|                       | accessions            | annotation            | Fe-deficient roots |         |         | Fe-deficient shoots |         |         |      |
|-----------------------|-----------------------|-----------------------|--------------------|---------|---------|---------------------|---------|---------|------|
|                       |                       |                       | RNAi/VC            | OXOS/VC | OXHV/VC | RNAi/VC             | OXOS/VC | OXHV/VC |      |
| TOM                   | Os11g0134900 AK069533 | OSTOM1                | 0.29               | 0.29    | 1.13    | 0.41                | 0.84    | 1.62    |      |
|                       | Os11g0135000 AK121911 | OSTOM2                | 0.95               | 0.80    | 1.19    | 1.03                | 0.74    | 1.34    |      |
|                       | Os11g0135000 AK066565 | OSTOM2                | 0.91               | 0.79    | 1.16    | 1.01                | 0.73    | 1.38    |      |
|                       | Os11g0135900 AK064297 | OSTOM3                | 0.90               | 0.85    | 1.29    | 0.81                | 0.97    | 1.01    |      |
|                       | Os11g0135900 AK072447 | OSTOM3                | 0.90               | 0.85    | 1.26    | 0.87                | 1.01    | 1.12    |      |
| ENA                   | Os11g0151500 AK102457 | OsENA1                | 0.85               | 0.83    | 1.10    | 0.98                | 0.74    | 1.06    |      |
|                       | Os06g0695800 AK064089 | OsENA2                | 0.95               | 1.00    | 1.02    | 1.00                | 1.05    | 1.04    |      |
| DMA                   | Os03g0307300 AB021746 | OsNAS1                | 0.98               | 0.94    | 1.02    | 1.23                | 0.78    | 1.23    |      |
|                       | Os03g0307300 AK112069 | OsNAS1                | 0.98               | 0.95    | 1.00    | 1.22                | 0.77    | 1.27    |      |
|                       | Os03g0307200 AB023818 | OsNAS2                | 0.96               | 0.87    | 1.03    | 1.31                | 0.79    | 1.46    |      |
|                       | Os03g0307200 AK112011 | OsNAS2                | 0.99               | 0.90    | 1.08    | 1.34                | 0.79    | 1.45    |      |
|                       | Os07g0689600 AB023819 | OsNAS3                | 0.95               | 0.91    | 1.17    | 0.82                | 0.64    | 1.35    |      |
|                       | Os07g0689600 AK070656 | OsNAS3                | 0.98               | 0.94    | 1.19    | 0.85                | 0.64    | 1.40    |      |
|                       | Os02g0306400 AB206814 | OsNAAT1               | 0.90               | 0.90    | 1.05    | 1.08                | 0.75    | 1.29    |      |
|                       | Os02g0306400 AK206814 | OsNAAT1               | 0.92               | 0.92    | 1.08    | 1.08                | 0.78    | 1.35    |      |
|                       | Os02g0302700 AK060537 | OsNAAT2               | 1.01               | 0.89    | 0.89    | 1.00                | 0.80    | 0.80    |      |
|                       | Os02g0302400 CI220718 | OsNAAT3               | 0.97               | 0.91    | 1.08    | 1.02                | 0.99    | 1.09    |      |
|                       | Os06g0345200 AK107186 | OsNAAT4               | 0.84               | 0.81    | 0.89    | 0.74                | 0.72    | 0.97    |      |
|                       | Os06g0345200 AK108576 | OsNAAT4               | 0.97               | 1.18    | 1.22    | 0.95                | 0.96    | 1.15    |      |
|                       | Os11g0644800 CI019806 | OsNAAT5               | 0.97               | 0.92    | 1.09    | 1.07                | 0.96    | 1.09    |      |
|                       | Os03g0237100 AK073738 | OsDMAS1               | 0.89               | 0.93    | 1.05    | 1.36                | 0.86    | 1.40    |      |
|                       | Methionine            | Os05g0135700 AK104875 | OsSAM1             | 1.05    | 1.09    | 1.01                | 0.94    | 0.87    | 0.99 |
|                       |                       | Os05g0135700 AK072051 | OsSAM1             | 1.06    | 1.13    | 1.03                | 0.92    | 0.87    | 1.00 |
|                       |                       | Os05g0135700 AJ296743 | OsSAM1             | 1.05    | 1.11    | 0.98                | 0.92    | 0.86    | 0.99 |
| Os05g0135700 AK103157 |                       | OsSAM1                | 1.03               | 1.07    | 0.98    | 0.91                | 0.88    | 1.00    |      |
| Os01g0323600 AK071516 |                       | OsSAMS2               | 0.85               | 0.88    | 0.93    | 1.08                | 0.86    | 1.07    |      |
| Os01g0323600 U82833   |                       | OsSAMS2               | 0.97               | 1.02    | 1.09    | 1.10                | 0.84    | 1.06    |      |
| Os06g0112200 AB110165 |                       | MTN                   | 0.83               | 0.88    | 1.02    | 1.16                | 0.93    | 1.13    |      |
| Os06g0112200 AF458088 |                       | MTN                   | 0.85               | 0.83    | 0.99    | 1.14                | 0.93    | 1.13    |      |
| Os06g0112200 AK066172 |                       | MTN                   | 0.85               | 0.87    | 1.03    | 1.14                | 0.92    | 1.15    |      |
| Os06g0112200 AK104481 |                       | MTN                   | 0.84               | 0.86    | 1.01    | 1.15                | 0.95    | 1.13    |      |
| Os06g0112200 AK104797 |                       | MTN                   | 0.86               | 0.87    | 1.02    | 1.14                | 0.94    | 1.11    |      |
| Os12g0589100 AK073627 |                       | OsAPT1                | 1.02               | 0.91    | 1.08    | 1.26                | 0.89    | 1.08    |      |
| Os12g0589100 AK104107 |                       | OsAPT1                | 1.05               | 0.93    | 1.11    | 1.25                | 0.85    | 1.11    |      |
| Os12g0589100 AK104808 |                       | OsAPT1                | 1.02               | 0.94    | 1.12    | 1.28                | 0.88    | 1.06    |      |
| Os04g0669900 C1111659 |                       | MTK                   | 0.96               | 0.93    | 1.23    | 1.29                | 0.83    | 1.32    |      |
| Os04g0669800 AK067649 |                       | OsMTK1                | 0.90               | 0.93    | 1.07    | 1.24                | 0.80    | 1.25    |      |
| Os04g0669800 AY593959 |                       | OsMTK1                | 0.89               | 0.89    | 1.05    | 1.31                | 0.84    | 1.29    |      |
| Os11g0216900 AK060326 |                       | OsIDI2                | 0.87               | 1.03    | 0.94    | 3.19                | 1.76    | 2.91    |      |
| Os11g0216900 AK060549 |                       | OsIDI2                | 0.82               | 0.86    | 1.03    | 1.10                | 1.00    | 1.13    |      |
| Os11g0216900 AK100869 |                       | OsIDI2                | 0.80               | 0.82    | 1.00    | 1.09                | 0.99    | 1.13    |      |
| Os04g0306400 AK103443 |                       | RPI                   | 0.87               | 0.96    | 1.15    | 1.09                | 0.79    | 1.30    |      |
| Os11g0484000 AK065321 |                       | DEP                   | 1.02               | 0.87    | 1.05    | 1.27                | 0.89    | 1.28    |      |
| Os10g0419400 AK103834 |                       | OsDIL1/OsADR1         | 0.95               | 0.99    | 1.36    | 3.18                | 1.45    | 4.36    |      |
| Os03g0161800 AK061653 |                       | OsIDI1/OsARD2         | 0.89               | 0.88    | 0.98    | 1.24                | 0.93    | 1.31    |      |
| Os03g0161800 AK099497 |                       | OsIDI1/OsARD2         | 0.78               | 0.83    | 0.92    | 1.15                | 0.89    | 1.20    |      |
| Os06g0486900 AK064610 |                       | FDH                   | 1.14               | 1.83    | 2.71    | 0.77                | 0.92    | 1.75    |      |
| Os06g0486800 AB019533 |                       | FDH                   | 1.17               | 0.96    | 1.12    | 1.29                | 0.77    | 1.33    |      |
| Os06g0486800 AK065872 |                       | FDH                   | 1.33               | 1.08    | 1.22    | 1.35                | 0.86    | 1.42    |      |
| Os06g0486800 AK104788 |                       | FDH                   | 1.30               | 1.08    | 1.22    | 1.34                | 0.84    | 1.48    |      |
| Os09g0453800 AK119212 |                       | OsIDI4                | 0.98               | 0.93    | 1.20    | 1.18                | 0.79    | 1.39    |      |
| Os09g0453800 AK120288 |                       | OsIDI4                | 0.85               | 0.85    | 1.03    | 1.13                | 0.86    | 1.36    |      |
| Os02g0714600 AK068469 |                       | PRPPs                 | 0.80               | 0.80    | 0.98    | 1.11                | 0.71    | 1.13    |      |
| Os02g0714600 AK103643 |                       | PRPPs                 | 0.80               | 0.78    | 0.92    | 1.18                | 0.74    | 1.17    |      |
| Os02g0714600 AK104867 | PRPPs                 | 0.80                  | 0.80               | 0.97    | 1.14    | 0.72                | 1.13    |         |      |
| Transporter           | Os01g0238700 AK121040 | OsYSL1                | 0.97               | 1.18    | 1.00    | 1.02                | 1.10    | 1.11    |      |
|                       | Os02g0649900 C1446246 | OsYSL2                | 1.08               | 0.78    | 1.75    | 1.16                | 1.51    | 1.86    |      |
|                       | Os05g0251900          | OsYSL3                | 1.01               | 0.84    | 1.22    | 1.02                | 0.87    | 0.82    |      |
|                       | Os05g0252000 AK068865 | OsYSL4                | 0.96               | 1.18    | 1.22    | 1.02                | 1.11    | 1.50    |      |
|                       | Os04g0390600 AK108750 | OsYSL5                | 1.10               | 1.13    | 1.06    | 1.12                | 1.03    | 1.19    |      |
|                       | Os04g0390500 AK100148 | OsYSL6                | 1.04               | 0.95    | 1.05    | 1.03                | 0.95    | 1.06    |      |
|                       | Os02g0116300 AK070691 | OsYSL7                | 0.86               | 0.92    | 0.95    | 0.90                | 0.83    | 0.76    |      |
|                       | Os02g0116300 AK100087 | OsYSL7                | 0.87               | 0.99    | 1.01    | 0.93                | 0.84    | 0.73    |      |
|                       | Os02g0116400 AK072347 | OsYSL8                | 0.46               | 1.07    | 0.75    | 0.70                | 0.90    | 0.87    |      |
|                       | Os04g0542200 AK120923 | OsYSL9                | 0.93               | 0.98    | 1.21    | 1.38                | 0.95    | 1.44    |      |
|                       | Os04g0542200 AY512581 | OsYSL9                | 1.01               | 1.02    | 1.17    | 1.45                | 1.09    | 1.55    |      |
|                       | Os04g0674600 AK069645 | OsYSL10               | 0.83               | 2.41    | 1.21    | 1.44                | 0.62    | 0.95    |      |
|                       | Os04g0524900          | OsYSL11               | 0.95               | 1.09    | 1.22    | 1.01                | 1.11    | 1.41    |      |
|                       | Os04g0524600 AK069437 | OsYSL12               | 1.50               | 1.52    | 1.62    | 2.31                | 2.46    | 2.19    |      |
|                       | Os04g0524500 AK067235 | OsYSL13               | 1.28               | 1.19    | 1.35    | 1.29                | 1.32    | 1.15    |      |
|                       | Os02g0633300 AK058249 | OsYSL14               | 1.11               | 0.97    | 1.04    | 1.10                | 1.05    | 0.94    |      |
|                       | Os02g0650300 AK063464 | OsYSL15               | 4.31               | 5.03    | 5.36    | 3.62                | 1.34    | 6.09    |      |
|                       | Os04g0542800 AK070304 | OsYSL16               | 0.63               | 0.74    | 0.91    | 0.68                | 0.57    | 0.63    |      |
|                       | Os04g0542800 AY512582 | OsYSL16               | 0.70               | 0.75    | 0.88    | 0.69                | 0.63    | 0.63    |      |
|                       | Os08g0280300          | OsYSL17               | 0.94               | 1.83    | 0.93    | 0.61                | 1.27    | 1.00    |      |
| Os01g0829900 AK070618 | OsYSL18               | 0.95                  | 1.04               | 1.21    | 1.14    | 0.96                | 1.09    |         |      |
| Os01g0829900 AY512583 | OsYSL18               | 0.94                  | 0.97               | 0.98    | 0.88    | 0.96                | 1.10    |         |      |
| Transcription factor  | Os01g0952800 AK073385 | OsIRO2                | 1.16               | 1.16    | 1.18    | 1.17                | 1.07    | 1.31    |      |
|                       | Os01g0952800 AK108392 | OsIRO2                | 1.22               | 1.22    | 1.21    | 1.15                | 1.07    | 1.21    |      |
|                       | Os08g0101000 AK107456 | IDEF1                 | 0.97               | 0.97    | 1.07    | 0.96                | 1.01    | 1.11    |      |
|                       | Os05g0426200 AK065065 | IDEF2                 | 0.88               | 0.88    | 0.98    | 1.06                | 1.08    | 1.08    |      |
|                       | Os05g0426200 AK099540 | IDEF2                 | 0.89               | 0.88    | 0.98    | 1.07                | 1.10    | 1.06    |      |

Ratio was calculated as (signal values of OXOs, OXHv or RNAi sample)/(signal values of vector control (VC) sample). TOM family genes, ENA family genes and the genes involved in the DMA biosynthetic pathway (DMA), methionine cycle (methionine), Fe transport (transporter) and transcription factors involved in Fe deficiency response (transcription factor) are listed. Pink indicates that gene expression was up-regulated and blue that gene expression was down-regulated compared to the expression levels of non-transcriptant rice. Italic means the expression ratio was up- or down regulated although P value log ratio was higher than 0.001.



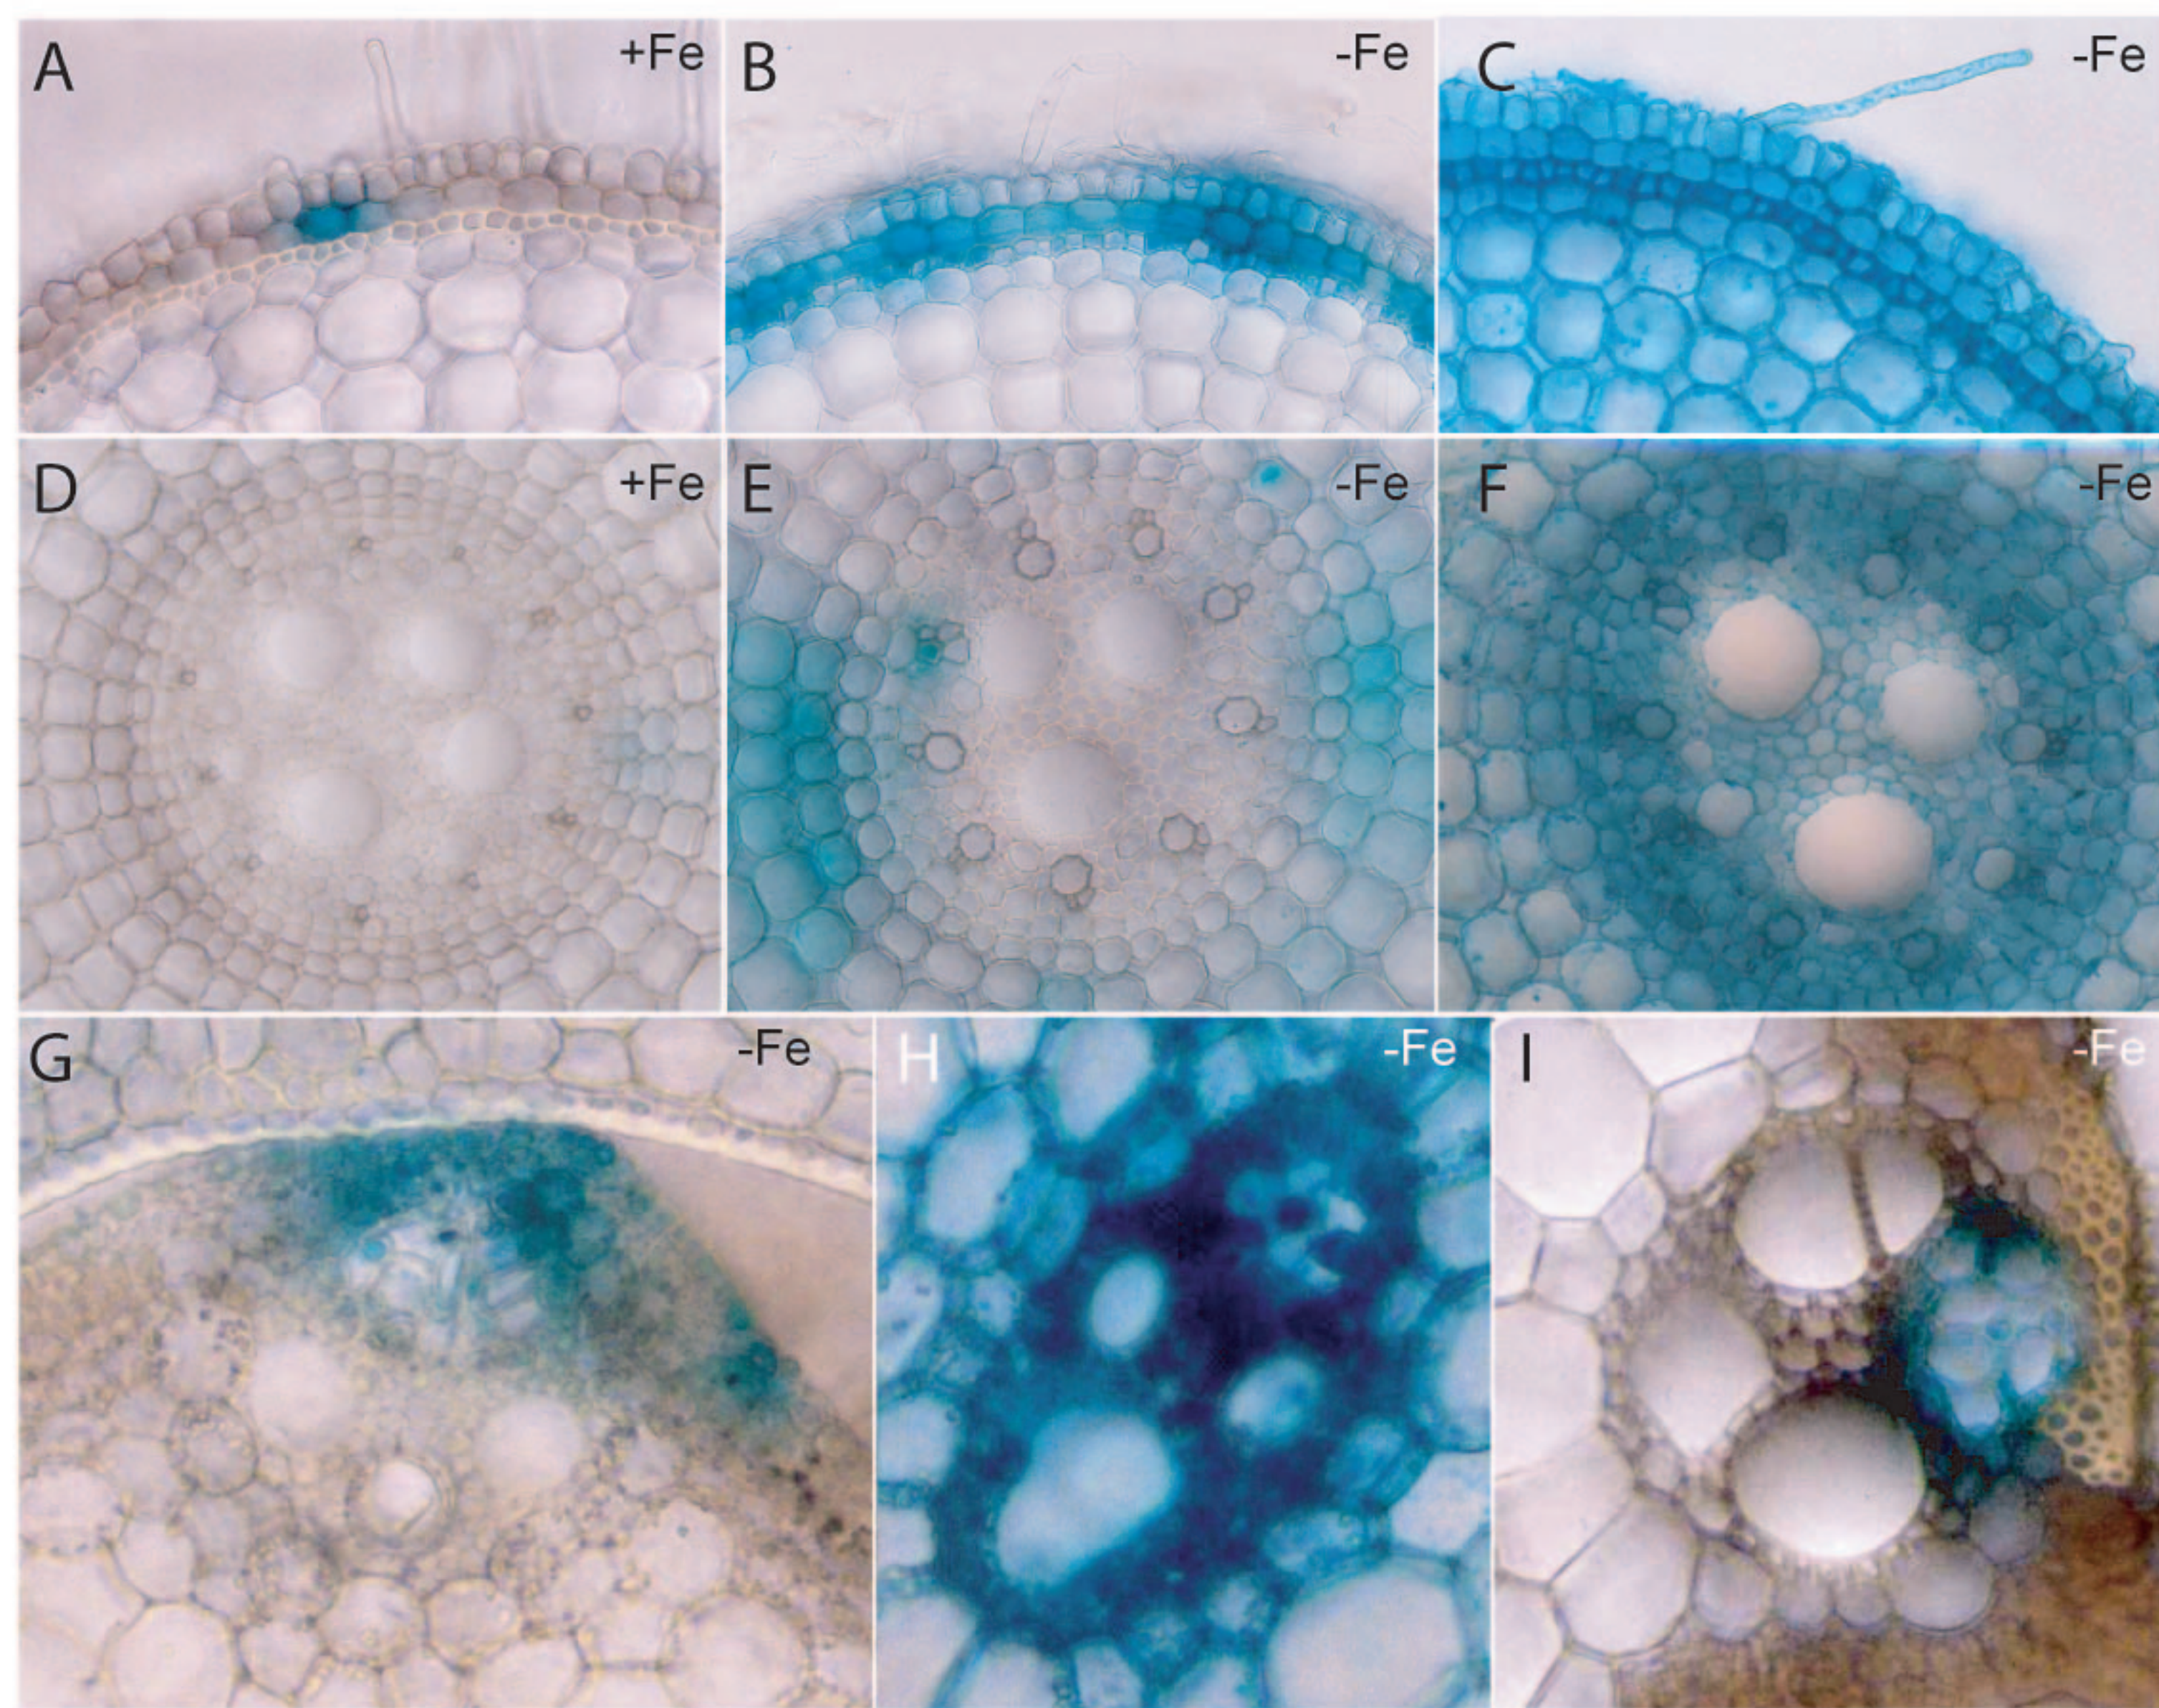

Fig. S1. Tissue distribution of TOM1. (A, D) Under Fe-sufficient conditions, TOM1 expression was observed only in part of the exodermis (A) but not in the cortex, endodermis and the central cylinder (D). (B, E) After 3 d under Fe-deficient conditions, TOM1 expression was observed in the exodermis, epidermis (B), and endodermis (E). After 10 days of Fe-deficiency, TOM1 expression was strongly induced in the exodermis, epidermis and root hair (C), as well as in the endodermis and central cylinder (F). After 10 days, TOM1 expression was also observed in the vascular bundles of the leaf sheath (G, H) and in phloem cells of the leaf (I).



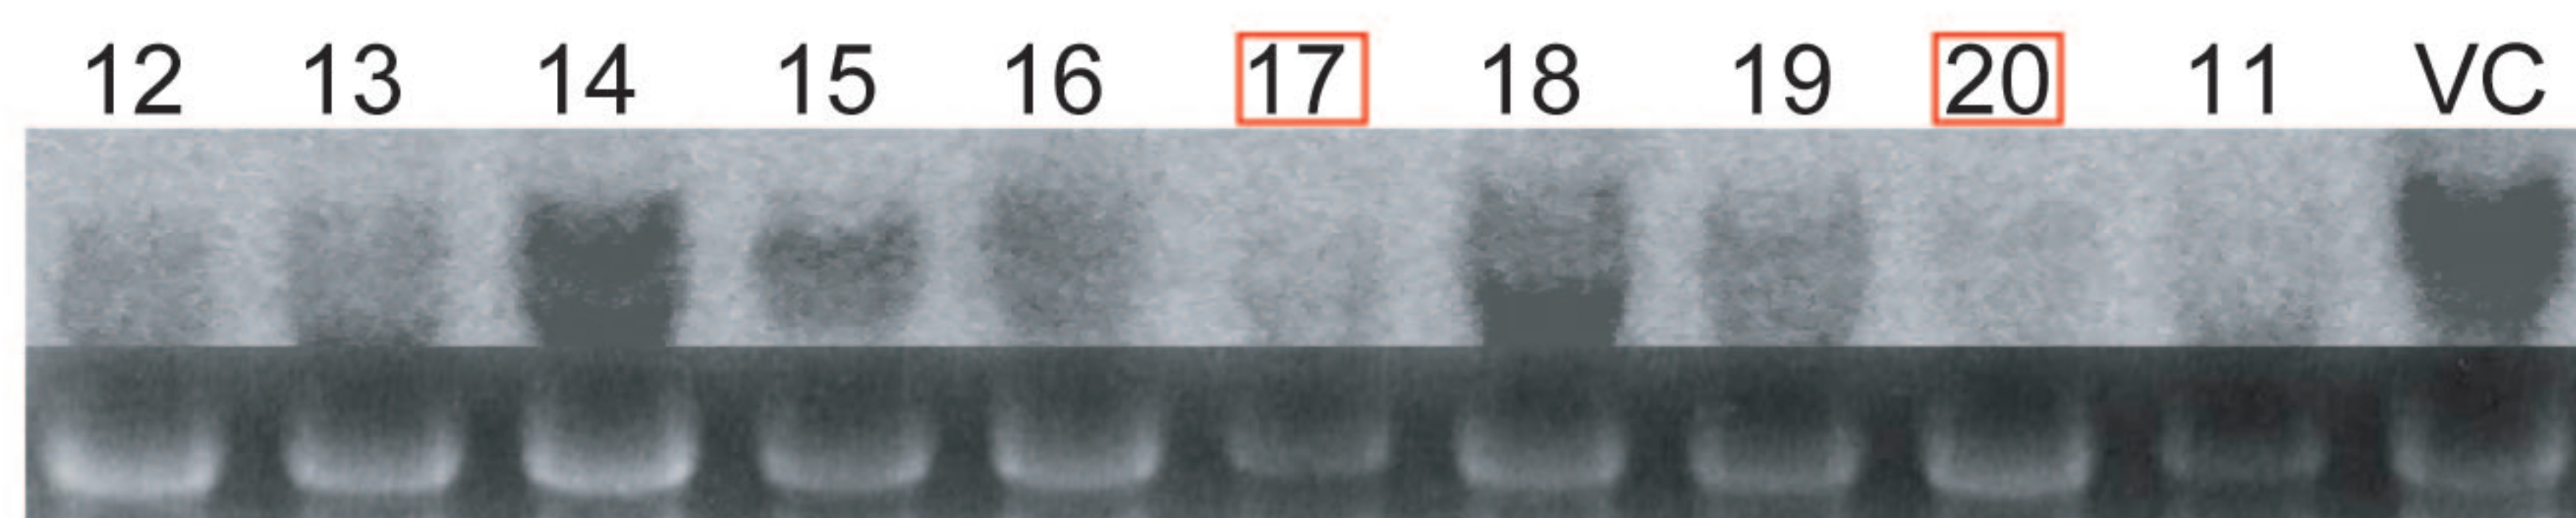

Fig. S2. Northern blot analysis of the RNAi lines using *TOMI* 3'-uncoding region. Red boxes indicated the lines for further experiments.



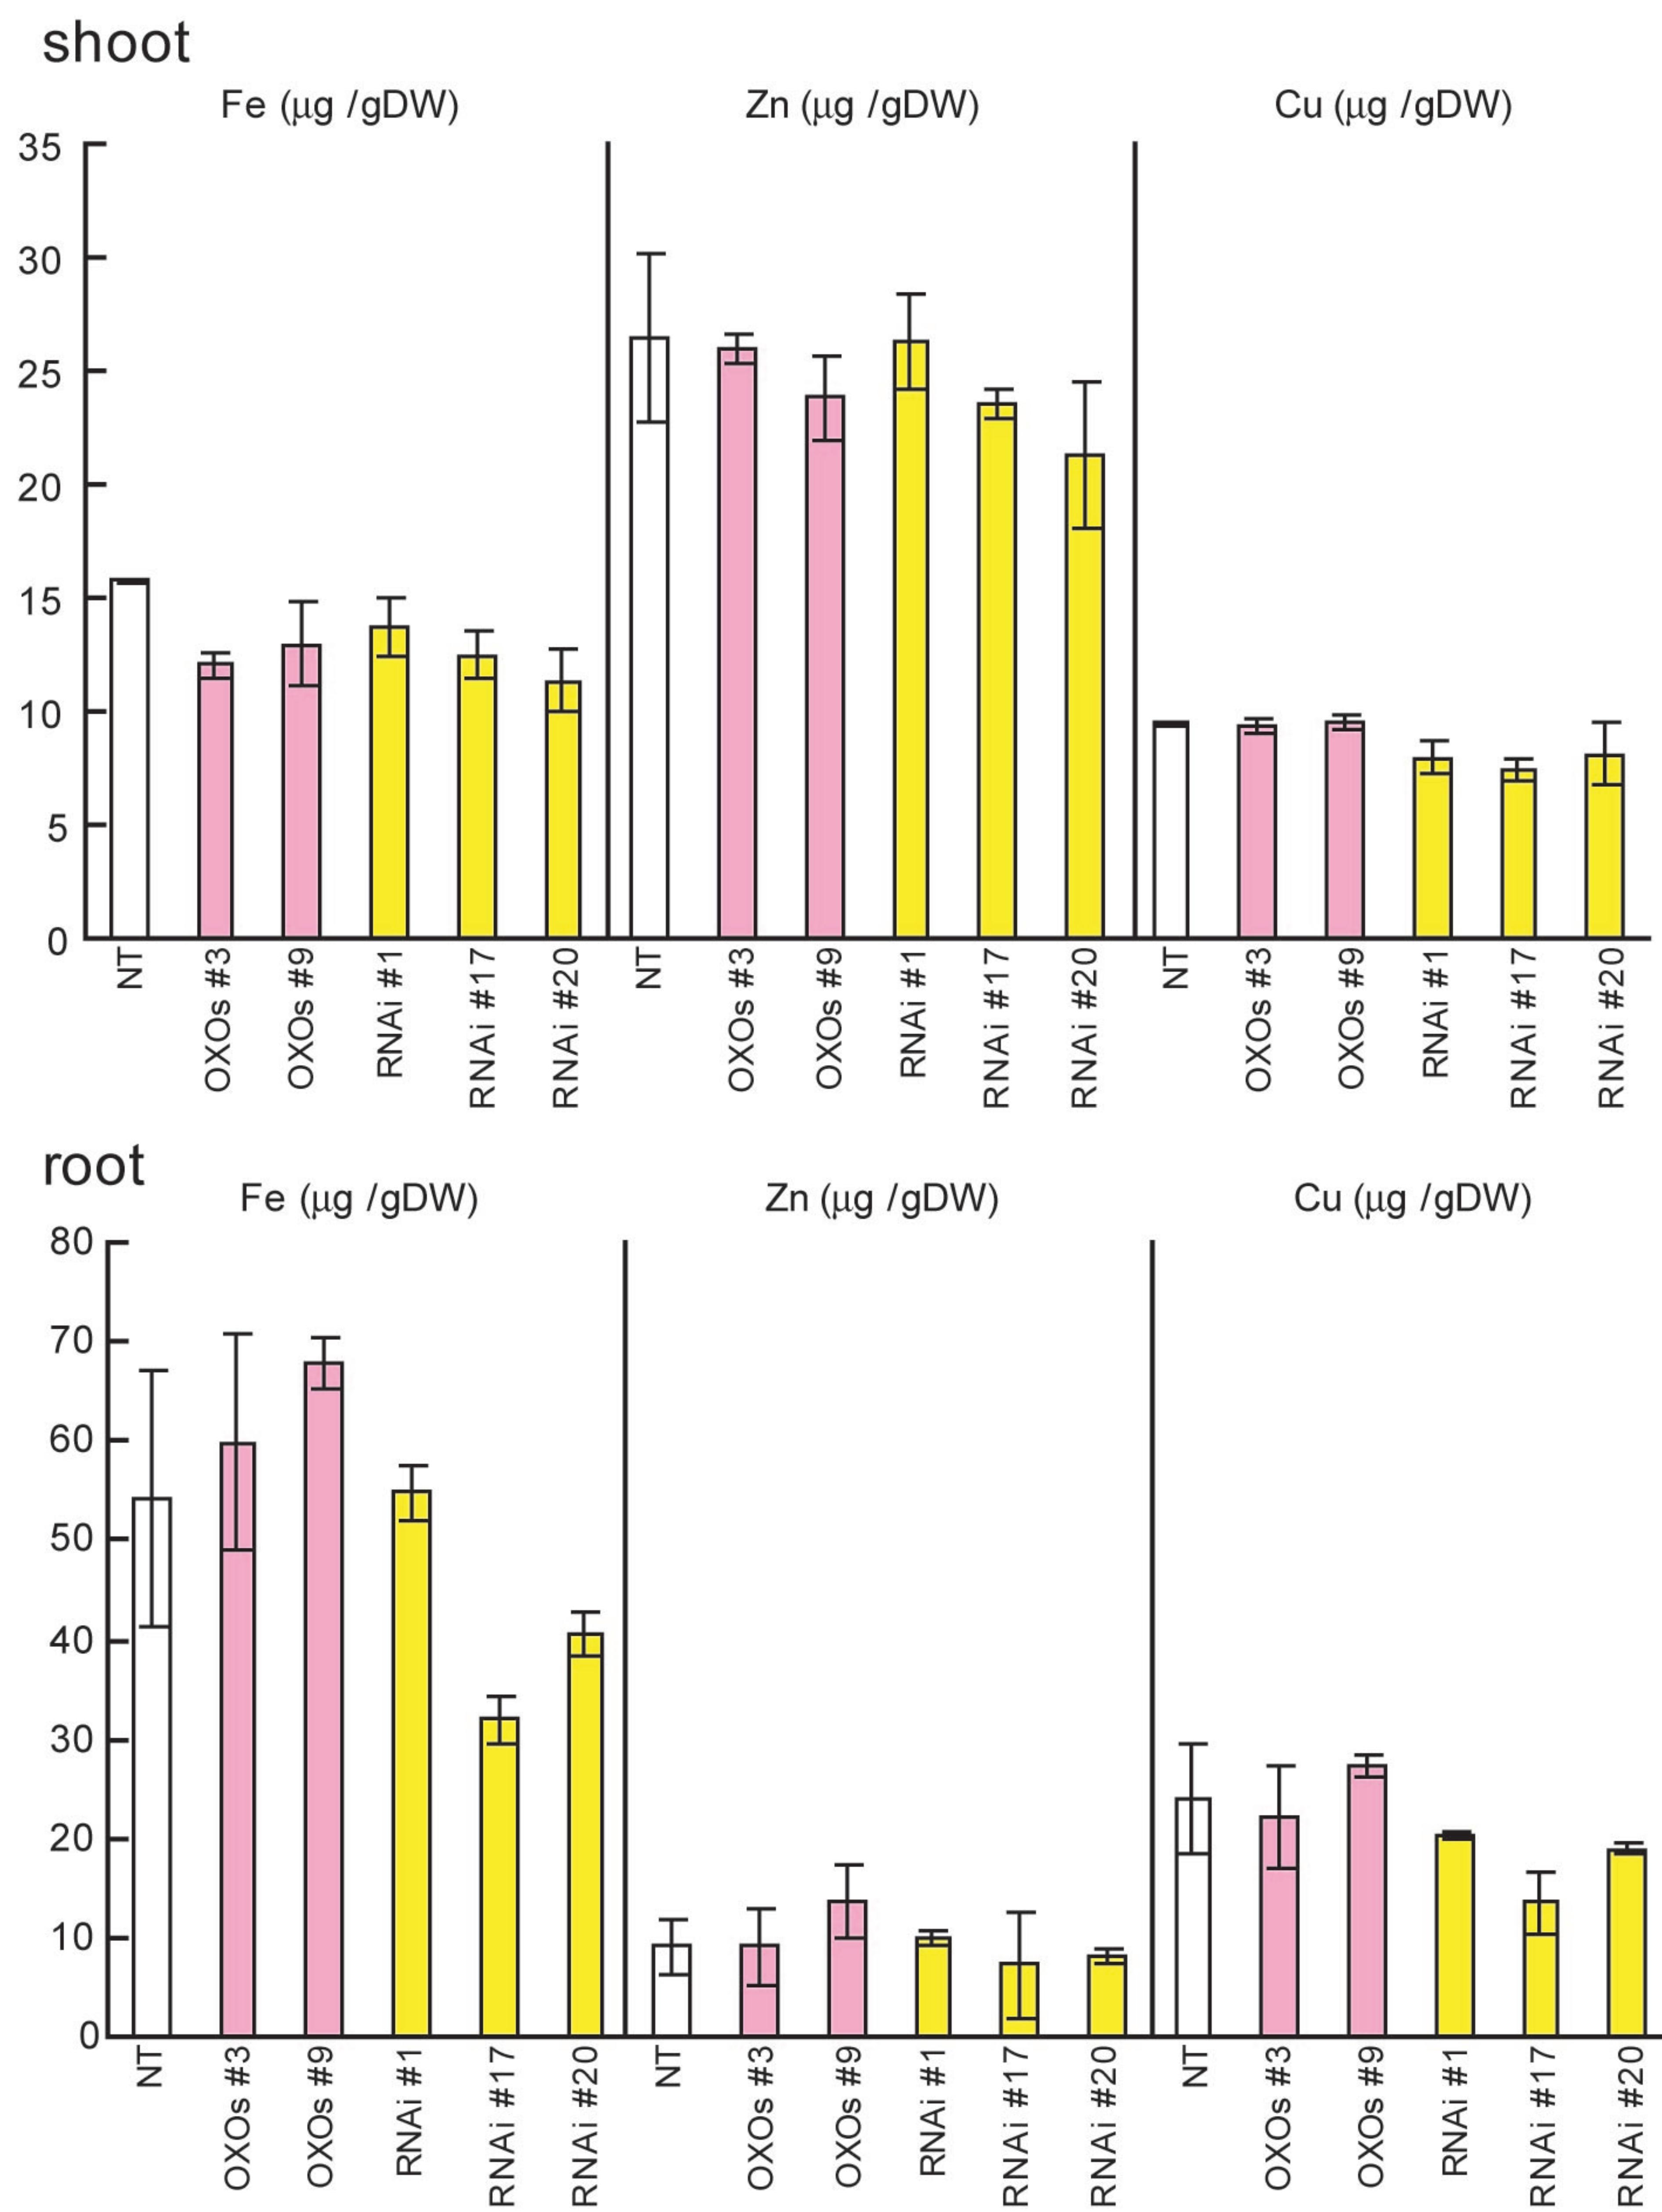

Fig. S3. Fe, Zn and Cu contents in the Fe deficient rice roots and shoots of OXOs, RNAi and NT.
